# Supplementary material for: Strategies for stable water splitting via protected photoelectrodes
Source: Royal Society of Chemistry journal article supplement (doi:10.1039/c6cs00918b), 2017-01-01
Supplement: c6cs00918b1.pdf [file c6cs00918b1.pdf]

## **Strategies for stable water splitting via protected photoelectrodes**

Dowon Bae,<sup>a</sup> Brian Seger,<sup>a</sup> Peter C.K. Vesborg,<sup>a</sup> Ole Hansen,<sup>b</sup> and Ib Chorkendorff<sup>a\*</sup>

<sup>a</sup>Department of Physics, Technical University of Denmark, DK-2800 Kgs. Lyngby, Denmark

<sup>b</sup>Department of Micro- and Nanotechnology, Technical University of Denmark, DK-2800 Kgs. Lyngby, Denmark

\*Corresponding author: [ibchork@fysik.dtu.dk](mailto:ibchork@fysik.dtu.dk); Tel: +45) 45 25 31 70; Fax: +45) 45 93 23 99

### **Supplementary Information**

**Table S1. Reported stabilities of photocathodes for hydrogen evolution reaction, and detailed working conditions.**

| Year | Photoelectrodes                          | Protection layer                     | Method                | Catalyst                       | Carrier transport | Thickness | pH   | Stability | Degradation | $J_{int}$ | Remark                                   | Ref. |
|------|------------------------------------------|--------------------------------------|-----------------------|--------------------------------|-------------------|-----------|------|-----------|-------------|-----------|------------------------------------------|------|
| 1977 | p-Si                                     | TiO <sub>2</sub>                     | CVD                   | NA                             | band bending      | NA        | 7    | 0.42      | 0           | NA        | Recorded data not shown                  | 39   |
| 1981 | p-InP                                    | Surface oxide                        | Chemical oxidation    | Ru                             | Tunneling         | NA        | 0    | 0.014     | 0           | NA        | Recorded data not shown                  | 52   |
| 1982 | p-InP                                    | Surface oxide                        | Chemical oxidation    | Rh                             | Tunneling         | NA        | -0.6 | 1         | 30          | 60        | 2-3 suns                                 | 53   |
| 1996 | p-Si                                     | No                                   | NA                    | Pt                             | NA                | NA        | 0    | 60        | 0           | 4         | 33 mW cm <sup>-2</sup> , @ 0V vs. SCE    | 54   |
| 1999 | GaAs/p-GaInP <sub>2</sub>                | No                                   | NA                    | Pt                             | NA                | NA        | -0.3 | 0.42      | 3.5         | 8.5       | 3.8 suns, @ 0V vs. SCE                   | 83   |
| 2008 | p-CuGaSe <sub>2</sub>                    | No                                   | NA                    | NA                             | NA                | NA        | 0.3  | 0.33      | 0           | 13        | @ -0.9V vs. SCE                          | 55   |
| 2010 | P-Cu(In,Ga)Se <sub>2</sub> /n-CdS        | No                                   | NA                    | Pt                             | band bending      | 50        | 9.5  | 0.67      | 20          | 11.2      | $\lambda = 350\text{--}800$ nm           | 56   |
| 2011 | p-Cu <sub>2</sub> O/n-AZO                | TiO <sub>2</sub>                     | ALD                   | Pt                             | band bending      | 10        | 5    | 0.014     | 22          | 5.7       | @ 0V vs. RHE                             | 40   |
| 2011 | p-Si                                     | No                                   | Drop cast             | Mo <sub>3</sub> S <sub>4</sub> | NA                | NA        | 0    | 1.08      | 6           | 14.4      | Light/Dark, 28.3 mW cm <sup>-2</sup>     | 57   |
| 2012 | pn <sup>+</sup> -Si                      | Ti                                   | Sputtering            | MoS <sub>x</sub>               | Ohmic             | 9         | 0    | 0.042     | 7           | 14        | 38.6 mW cm <sup>-2</sup> , @ 0V vs. RHE  | 38   |
| 2012 | p-InP                                    | TiO <sub>2</sub>                     | ALD                   | Ru                             | band bending      | 5         | 0    | 0.17      | 0           | 35        | @ 0.23 V vs. NHE                         | 41   |
| 2012 | p-Cu <sub>2</sub> O/n-AZO                | TiO <sub>2</sub>                     | ALD                   | Pt                             | band bending      | 20        | 5    | 0.042     | 38          | 4.2       | @ 0V vs. RHE                             | 58   |
| 2012 | pn <sup>+</sup> -Si                      | No                                   | NA                    | Ni-Mo                          | NA                | NA        | 4.5  | 0.042     | 9           | 10.1      | @ 0V vs. RHE                             | 59   |
| 2012 | p-CuGa <sub>3</sub> Se <sub>5</sub> /ZnS | No                                   | NA                    | Pt                             | NA                | NA        | 9.5  | 1.042     | 0           | 2.8       | Measured @ 0.1V vs. RHE                  | 60   |
| 2012 | p-Cu <sub>2</sub> O                      | NiO <sub>x</sub>                     | Spin coating          | NiO <sub>x</sub>               | band bending      | 10        | 6    | 0.014     | 28          | 0.42      | 26 mW cm <sup>-2</sup> , @ 0.1V vs. NHE  | 65   |
| 2013 | pn <sup>+</sup> -Si                      | TiO <sub>2</sub>                     | ALD                   | Pt                             | band bending      | 100       | 0    | 30        | 14          | 21.5      | @ 0.3V vs. RHE, 38.6 mW cm <sup>-2</sup> | 42   |
| 2013 | pn <sup>+</sup> -Si                      | TiO <sub>2</sub>                     | Sputtering            | Pt                             | band bending      | 100       | 0    | 3         | 0           | 20        | @ 0.3V vs. RHE, 38.6 mW cm <sup>-2</sup> | 43   |
| 2013 | P3HT/PCBM                                | TiO <sub>2</sub> :MoS <sub>3</sub>   | Spin coating          | MoS <sub>x</sub>               | NA                | 90        | 0.3  | 0.0313    | 8           | 0.05      | $\lambda > 400$ nm, @ 0.16 V vs. RHE     | 61   |
| 2013 | p-Cu <sub>2</sub> O                      | Carbon                               | Glucose decomposition | NA                             | NA                | 20        | 7    | 0.042     | 19.3        | 4         | @ 0V vs. RHE                             | 62   |
| 2013 | pn <sup>+</sup> -Si                      | MoS <sub>2</sub>                     | Sputtering            | MoS <sub>2</sub>               | NA                | 10        | 0    | 5         | 0           | 7         | 38.6 mW cm <sup>-2</sup> , @ 0V vs. RHE  | 63   |
| 2013 | n-i-p Si                                 | TiO <sub>2</sub>                     | Sputtering            | Pt                             | band bending      | 80        | 4    | 0.5       | 5           | 10.8      | @ 0V vs. RHE                             | 64   |
| 2013 | p-WSe <sub>2</sub>                       | Ru/Pt                                | Photodeposition       | Pt                             | Schottky junction | NA        | 2    | 0.0833    | 0           | 15.8      | @ 0V vs. RHE                             | 84   |
| 2013 | p-WSe <sub>2</sub>                       | Ru/Pt                                | Photodeposition       | Pt                             | Schottky junction | NA        | 10   | 0.0833    | 9           | 14        | @ 0V vs. RHE                             | 84   |
| 2014 | pn <sup>+</sup> -Si                      | TiO <sub>2</sub>                     | Spin casting          | Ir                             | band bending      | 50        | 14   | 3         | 19          | 30        | @ 0.3V vs. RHE                           | 13   |
| 2014 | p-Cu <sub>2</sub> O/n-AZO                | TiO <sub>2</sub> /MoS <sub>2+x</sub> | ALD/Photodeposition   | MoS <sub>2+x</sub>             | band bending      | 100       | 4    | 0.42      | 6           | 4.5       | @ 0V vs. RHE                             | 16   |
| 2014 | p-Cu <sub>2</sub> O/n-AZO                | TiO <sub>2</sub> /MoS <sub>2+x</sub> | ALD/Photodeposition   | MoS <sub>2+x</sub>             | band bending      | 100       | 9    | 0.42      | 40          | 2         | @ 0V vs. RHE                             | 16   |
| 2014 | p-Cu <sub>2</sub> O/n-AZO                | TiO <sub>2</sub> /MoS <sub>2+x</sub> | ALD/Photodeposition   | MoS <sub>2+x</sub>             | band bending      | 100       | 1    | 0.25      | 77          | 5.7       | @ 0V vs. RHE                             | 16   |
| 2014 | p-Cu <sub>2</sub> O/n-AZO                | TiO <sub>2</sub>                     | Electrodeposition     | Pt                             | band bending      | 100       | 1    | 0.1       | 29          | 7         | @ 0V vs. RHE                             | 16   |
| 2014 | p-Cu <sub>2</sub> O/n-AZO                | TiO <sub>2</sub>                     | ALD                   | RuO <sub>2</sub>               | band bending      | 100       | 5    | 8         | 6           | 5         | @ 0V vs. RHE                             | 46   |

|      |                                                                  |                                |                            |                  |                   |        |       |        |     |      |                                         |    |
|------|------------------------------------------------------------------|--------------------------------|----------------------------|------------------|-------------------|--------|-------|--------|-----|------|-----------------------------------------|----|
| 2014 | p-Si                                                             | SrTiO <sub>3</sub>             | MBE                        | Pt               | band bending      | 1.6    | 0.3   | 1.46   | 6   | 31   | @ 0V versus Ag/AgCl                     | 48 |
| 2014 | pn <sup>+</sup> -Si                                              | MoS <sub>2</sub>               | CVD                        | MoS <sub>2</sub> | band bending      | 40-80  | 0.3   | 0.125  | 30  | 17.5 | @ 0V vs. RHE                            | 66 |
| 2014 | p-Si                                                             | Al <sub>2</sub> O <sub>3</sub> | ALD                        | Pt               | Tunneling         | 2.3    | 0.3   | 0.5    | 0   | 30   | @ -0.9V vs. RHE                         | 67 |
| 2014 | p-(Ag,Cu)GaSe <sub>2</sub> /CdS                                  | No                             | NA                         | Pt               | NA                | NA     | 10    | 2.3    | 0   | 7    | @ 0V vs. RHE, Ag 5.9%                   | 68 |
| 2014 | pn <sup>+</sup> -Si                                              | MoS <sub>2</sub>               | Sputtering/Sulfidation     | MoS <sub>2</sub> | NA                | 3.6    | 0.3   | 4.17   | 0   | 17.5 | @ 0V vs. RHE                            | 69 |
| 2014 | p-GaP                                                            | No                             | NA                         | Pt               | NA                | NA     | 0     | 1      | 97  | 0.78 | @ 0V vs. RHE, 38.6 mW cm <sup>-2</sup>  | 85 |
| 2014 | p-GaP                                                            | TiO <sub>2</sub>               | Sputtering                 | Pt               | band bending      | 100    | 0     | 1      | 8   | 1.04 | @ 0V vs. RHE, 38.6 mW cm <sup>-2</sup>  | 85 |
| 2014 | p-GaP                                                            | Nb <sub>2</sub> O <sub>5</sub> | Sputtering                 | Pt               | band bending      | 100    | 0     | 1      | 90  | 0.66 | @ 0V vs. RHE, 38.6 mW cm <sup>-2</sup>  | 85 |
| 2015 | p-(Ag,Cu)GaSe <sub>2</sub> /CdS                                  | No                             | NA                         | Pt               | NA                | NA     | 7     | 20     | 0   | 7.9  | @ 0V vs. RHE                            | 18 |
| 2015 | p-GaP                                                            | Surface oxide                  | Chemical oxidation         | Pt               | Tunneling         | NA     | 0     | 0.271  | 7.8 | 9.1  | @ 0V vs. RHE                            | 19 |
| 2015 | p-InP                                                            | TiO <sub>2</sub>               | ALD                        | Pt               | band bending      | 10     | 0     | 0.083  | 0   | 25   | @ 0V vs. RHE                            | 23 |
| 2015 | p-Si                                                             | Ti/Ni                          | Evaporation                | Ni               | Schottky junction | 15/5   | 14    | 0.5    | 50  | 10   | CP @ 10mA cm <sup>-2</sup> , 2.25 suns  | 71 |
| 2015 | p-Si                                                             | Ti/Ni                          | Evaporation                | Ni               | Schottky junction | 15/5   | 9.5   | 0.5    | 30  | 10   | CP @ 10mA cm <sup>-2</sup> , 2.25 suns  | 71 |
| 2015 | p-Cu(In,Ga)Se <sub>2</sub>                                       | TiO <sub>2</sub> :Pt           | CVD                        | Pt               | band bending      | 100    | 0.3   | 1.042  | 0   | 9    | @ 0V vs. RHE                            | 72 |
| 2015 | pn <sup>+</sup> mc-Si                                            | Al <sub>2</sub> O <sub>3</sub> | ALD                        | NA               | Tunneling         | 4.5    | 1     | 4.17   | 0   | 27.5 | @ -0.8V vs. RHE                         | 73 |
| 2015 | p-Cu(In,Ga)Se <sub>2</sub> /CdS                                  | Ti/Mo                          | Sputtering                 | Pt               | NA                | 3/3    | 6.8   | 10     | 30  | 24   | @ 0V vs. RHE                            | 74 |
| 2016 | pn <sup>+</sup> -Si                                              | TiO <sub>2</sub>               | Sputtering                 | Pt               | band bending      | 100    | 14    | 1      | 3   | 17.5 | @ 0.3V vs. RHE 38.6 mW cm <sup>-2</sup> | 34 |
| 2016 | p-Cu(In,Ga)Se <sub>2</sub> /CdS/i-ZnO/AZO                        | TiO <sub>2</sub>               | ALD                        | Pt               | band bending      | 100    | 0.3   | 0.417  | 33  | 28.6 | @ 0V vs. RHE                            | 70 |
| 2016 | a-SiC                                                            | TiO <sub>2</sub> /Ni           | ALD                        | Ni-Mo            | band bending      | 25     | 14    | 0.042  | 65  | 13.6 | @ 0V vs. RHE                            | 75 |
| 2016 | PEDOT:PSS/CH <sub>3</sub> NH <sub>3</sub> PbI <sub>3</sub> /PCBM | Ag/InBiSn                      | Evaporation/Melting        | Pt               | NA                | 100/NA | 8.5   | 0.0625 | 20  | 7.7  | @ 0V vs. RHE, Back-illuminated          | 76 |
| 2016 | p-InP                                                            | Ti/MoS <sub>x</sub>            | Sputtering/Photodeposition | MoS <sub>x</sub> | Schottky junction | 10/35  | 0     | 0.083  | 11  | 15.8 | @ 0V vs. RHE                            | 77 |
| 2016 | a-Si:H/a-Si:H/uc-Si:H/uc-Si:H/AZO/Ag                             | Ni                             | Evaporation                | Ni               | Ohmic             | 150    | 13    | 0.17   | 0   | 6.1  | @ 0V vs. RHE                            | 78 |
| 2016 | a-Si:H/uc-Si:H/uc-Si:H/AZO/Ag                                    | Pt                             | Evaporation                | Pt               | Ohmic             | 150    | 13    | 0.17   | 7   | 7    | @ 0V vs. RHE                            | 78 |
| 2016 | a-Si:H/a-SiGe:H                                                  | TiO <sub>2</sub> :H            | Sputtering                 | NA               | band bending      | 80     | 13.6  | 0.21   | 8   | 6    | @ 0V vs. RHE                            | 79 |
| 2016 | p-Cu <sub>2</sub> O                                              | SnO <sub>2</sub>               | ALD                        | RuO <sub>2</sub> | band bending      | 50     | 5     | 2.34   | 10  | 3.9  | @ 0V vs. RHE                            | 80 |
| 2016 | p-GaInP <sub>2</sub>                                             | MoS <sub>2</sub>               | Sputtering/Sulfidation     | MoS <sub>2</sub> | NA                | 3      | -0.48 | 2.92   | 18  | 6.2  | @ -0.025V vs. RHE                       | 81 |
| 2016 | nc-Si/SiO <sub>2</sub> /p-Si/SiO <sub>2</sub> /nc-Si             | TiO <sub>2</sub> :H            | Sputtering                 | Pt               | band bending      | 100    | 0     | 41     | 13  | 20.5 | @ 0.4V vs. RHE                          | 82 |
| 2016 | a-Si:H/uc-Si:H/uc-Si:H/AZO/Ag                                    | Pt                             | Evaporation                | Pt               | Ohmic             | 150    | 14    | 0.0035 | 35  | 7.7  | @ 0V vs. RHE                            | 78 |

Note that units for thickness, stability,  $J_{int}$  and degradation are nm, days, mA cm<sup>-2</sup> and %, respectively.

**Table S2. Reported stabilities of photoanodes for oxygen evolution reaction, and detailed working conditions.**

| Year | Photoelectrodes                        | Protection layer                  | Method                             | Catalyst                             | Carrier transport | Thickness | pH   | Stability | Degradation | $J_{int}$ | Remark                                   | Ref. |
|------|----------------------------------------|-----------------------------------|------------------------------------|--------------------------------------|-------------------|-----------|------|-----------|-------------|-----------|------------------------------------------|------|
| 1984 | n-Si                                   | SiO <sub>2</sub>                  | Chemical oxidation                 | Pt                                   | Tunneling         | 10        | 0.3  | 4.2       | 30          | 0.9       | 40 mW cm <sup>-2</sup> , @ 2.02V vs. NHE | 36   |
| 1986 | n-Si                                   | Pd/Mn <sub>2</sub> O <sub>3</sub> | CBD                                | Mn <sub>2</sub> O <sub>3</sub>       | NA                | 20        | 4.7  | 25        | 21          | 1.4       | @1.3V vs. NHE                            | 100  |
| 1987 | np <sup>+</sup> -Si                    | Pt/Ni                             | Sputtering                         | Ni                                   | Ohmic             | 3         | 14   | 0.33      | 0           | 15        | @1.0V vs. Hg/HgO, 80 mW cm <sup>-2</sup> | 37   |
| 1987 | np <sup>+</sup> -Si                    | Pt/Ni-W                           | Sputtering/Electrodeposition       | Ni-W                                 | Ohmic             | 3         | 14   | 0.17      | 0           | 14        | @1.0V vs. Hg/HgO, 80 mW cm <sup>-2</sup> | 37   |
| 1987 | n-GaAs                                 | Pt/Mn <sub>2</sub> O <sub>3</sub> | CBD                                | Mn <sub>2</sub> O <sub>3</sub>       | NA                | 20        | 13.7 | 0.056     | 0           | 11        | Unknown fixed potential                  | 101  |
| 2011 | n-Si                                   | TiO <sub>2</sub> /Ir              | ALD                                | Ir                                   | Tunneling         | 2         | 7    | 0.75      | 0           | 5.1       | @1.5V vs. Ag/AgCl                        | 44   |
| 2011 | n-Si                                   | TiO <sub>2</sub> /Ir              | ALD                                | Ir                                   | Tunneling         | 2         | 0    | 0.33      | 0           | 1         | @1.0 mA cm <sup>-2</sup> in CP           | 44   |
| 2011 | n-Si                                   | TiO <sub>2</sub> /Ir              | ALD                                | Ir                                   | Tunneling         | 2         | 13.6 | 0.33      | 0           | 1         | @1.0 mA cm <sup>-2</sup> in CP           | 44   |
| 2011 | 3J a-Si                                | FTO/CoO <sub>x</sub>              | Unknown/Photodeposition            | CoO <sub>x</sub>                     | NA                | 70        | 9.2  | 1.33      | 0           | 4.5       | @1.3V vs. RHE                            | 102  |
| 2012 | Ta <sub>3</sub> N <sub>5</sub>         | Co <sub>3</sub> O <sub>4</sub>    | Calcination of Co(OH) <sub>x</sub> | Co <sub>3</sub> O <sub>4</sub>       | NA                | 10        | 13.6 | 0.83      | 27          | 1.1       | @1.2V vs. RHE                            | 103  |
| 2012 | n-Si                                   | NiO <sub>x</sub>                  | Spin coating                       | NiO <sub>x</sub>                     | band bending      | 37.4      | 7.2  | 3         | 84          | 6.4       | @1.92V vs. RHE                           | 104  |
| 2013 | n-Fe <sub>2</sub> O <sub>3</sub> :Pt   | No                                | NA                                 | Co-Pi                                | NA                | NA        | 7    | 0.125     | 7           | 4.3       | @1.23 V vs. RHE                          | 27   |
| 2013 | n-Si                                   | Ni                                | Evaporation                        | NiO <sub>x</sub>                     | band bending      | 2         | 9.5  | 3.33      | 0           | 10        | @10 mA cm <sup>-2</sup> in CP, 2.25 suns | 105  |
| 2013 | n-Si                                   | Ni                                | Evaporation                        | NiO <sub>x</sub>                     | band bending      | 2         | 14   | 0.5       | 0           | 10        | @10 mA cm <sup>-2</sup> in CP, 2.25 suns | 105  |
| 2013 | n-BiVO <sub>4</sub>                    | CoO <sub>x</sub>                  | ALD                                | CoO <sub>x</sub>                     | NA                | 1         | 13   | 0.069     | 7           | 1.35      | @1.23 V vs. RHE                          | 106  |
| 2013 | n-Si                                   | MnO <sub>x</sub>                  | ALD                                | MnO <sub>x</sub>                     | State-mediated    | 10        | 14   | 0.0208    | 0           | 22.5      | @1.62 V vs. RHE                          | 107  |
| 2013 | BaTaO <sub>2</sub> N:H                 | No                                | NA                                 | RhO <sub>x</sub> w/ CoO <sub>x</sub> | NA                | NA        | 8    | 0.042     | 14          | 14        | @1.07 V vs. RHE                          | 108  |
| 2013 | n-Si                                   | NiRuO <sub>x</sub>                | Sputtering                         | NiRuO <sub>x</sub>                   | Shottky junction  | NA        | 7.2  | 0.0625    | 15          | 7         | CV 500 cycles                            | 109  |
| 2013 | CaFe <sub>2</sub> O <sub>4</sub> /TaON | No                                | NA                                 | Co-Pi                                | NA                | NA        | 11   | 0.125     | 50          | 1         | @1.23 V vs. RHE                          | 133  |
| 2014 | np <sup>+</sup> -Si                    | TiO <sub>2</sub>                  | ALD                                | Ni                                   | State-mediated    | 44        | 14   | 4.58      | 10          | 40        | @2 V vs. RHE, 1.25 Suns                  | 14   |
| 2014 | np <sup>+</sup> -GaAs                  | TiO <sub>2</sub>                  | ALD                                | Ni                                   | State-mediated    | 118       | 14   | 1.042     | 8           | 14        | @ 1.26 V vs. RHE                         | 14   |
| 2014 | n-GaP                                  | TiO <sub>2</sub>                  | ALD                                | Ni                                   | State-mediated    | 118       | 14   | 0.23      | 18          | 1.1       | @ 1.26 V vs. RHE                         | 14   |
| 2014 | WO <sub>3</sub>                        | No                                | NA                                 | NA                                   | NA                | NA        | -1.2 | 0.5       | 53          | 2.35      | @ 0.87V vs. RHE                          | 15   |
| 2014 | n-BiVO <sub>4</sub>                    | FeOOH/NiOOH                       | Photodeposition                    | FeOOH/NiOOH                          | NA                | NA        | 7    | 2         | 0           | 2.6       | @ 0.6V vs. RHE                           | 17   |
| 2014 | np <sup>+</sup> -Si                    | NiO <sub>x</sub> :Fe              | Sputtering                         | NiO <sub>x</sub> :Fe                 | band bending      | 50        | 14   | 12.5      | 17          | 17.5      | @1.3V vs. RHE, 38.6 mW cm <sup>-2</sup>  | 110  |
| 2014 | np <sup>+</sup> -Si                    | CoO <sub>x</sub>                  | ALD                                | CoO <sub>x</sub>                     | NA                | 2         | 13.6 | 1         | 0           | 10        | @10 mA cm <sup>-2</sup> in CP            | 111  |
| 2014 | n-CdTe                                 | TiO <sub>2</sub>                  | ALD                                | Ni                                   | band bending      | 140       | 14   | 4.17      | 14          | 22        | @2.07V vs. RHE                           | 112  |
| 2014 | n-Ta <sub>3</sub> N <sub>5</sub>       | Ferrihydrite                      | CBD                                | Co <sub>3</sub> O <sub>4</sub>       | NA                | NA        | 13.6 | 0.25      | 6           | 5         | @1.23V vs. RHE                           | 113  |
| 2014 | n-BiVO <sub>4</sub>                    | TiO <sub>2</sub> /Ni              | ALD/Sputtering                     | Ni                                   | NA                | 1         | 13   | 0.17      | 0           | 1.35      | @1.23V vs. RHE, 1.35 suns                | 114  |

|      |                                                         |                                      |                                |                         |                |           |      |       |     |      |                                          |     |
|------|---------------------------------------------------------|--------------------------------------|--------------------------------|-------------------------|----------------|-----------|------|-------|-----|------|------------------------------------------|-----|
| 2014 | np <sup>+</sup> -Si                                     | ITO/Au/ITO                           | Sputtering                     | NiO <sub>x</sub>        | band bending   | 100/5/100 | 13.6 | 0.042 | 5   | 11.7 | CV 360 cycles, 51.2 mW cm <sup>-2</sup>  | 115 |
| 2014 | n-CaFe <sub>2</sub> O <sub>4</sub> /n-BiVO <sub>4</sub> | No                                   | NA                             | Co-Pi                   | NA             | > 300     | 7    | 0.083 | 60  | 4.3  | @ 1.3V vs. RHE                           | 116 |
| 2014 | np <sup>+</sup> -Si                                     | IrO <sub>x</sub>                     | Sputtering                     | IrO <sub>x</sub>        | Ohmic          | 4         | 0    | 0.75  | 0   | 12.5 | @1.23V vs. RHE, 38.6 mW cm <sup>-2</sup> | 117 |
| 2014 | n-WO <sub>3</sub> /n-BiVO <sub>4</sub> :(W,Mo)          | FeOOH/NiOOH                          | Photodeposition                | FeOOH/NiOOH             | NA             | NA        | 7    | 7     | 8.7 | 3.1  | @0.6V vs. RHE                            | 118 |
| 2015 | np <sup>+</sup> -InP                                    | NiO <sub>x</sub>                     | Sputtering                     | NiO <sub>x</sub>        | Ohmic          | 75        | 14   | 2     | 21  | 24   | @1.73V vs. RHE                           | 21  |
| 2015 | n-BiVO <sub>4</sub> :N                                  | FeOOH/NiOOH                          | Photodeposition                | FeOOH/NiOOH             | NA             | NA        | 7.2  | 2.21  | 46  | 3.2  | @0.6V vs. RHE                            | 22  |
| 2015 | np <sup>+</sup> -Si                                     | TiO <sub>2</sub> /NiCrO <sub>x</sub> | ALD/Sputtering                 | NiCrO <sub>x</sub>      | NA             | 94        | 14   | 91.67 | 0   | 4.7  | @1.59V vs. RHE                           | 45  |
| 2015 | np <sup>+</sup> -Si                                     | TiO <sub>2</sub>                     | Sputtering                     | Pt                      | Ohmic          | 100       | 0    | 2.5   | 0   | 22   | @1.68V vs. RHE, 38.6 mW cm <sup>-2</sup> | 50  |
| 2015 | np <sup>+</sup> -Si                                     | NiO <sub>x</sub>                     | Sputtering                     | NiO <sub>x</sub>        | NA             | 75        | 14   | 50    | 6   | 33.6 | @1.73V vs. RHE                           | 119 |
| 2015 | n-CdTe/NiO <sub>x</sub>                                 | NiO <sub>x</sub>                     | Sputtering                     | NiO <sub>x</sub>        | NA             | 75        | 14   | 41.67 | 0   | 22.5 | @1.73V vs. RHE                           | 120 |
| 2015 | HTJ-Si                                                  | NiO <sub>x</sub>                     | Sputtering                     | NiO <sub>x</sub>        | NA             | 75        | 14   | 8.3   | 0   | 35   | @1.73V vs. RHE                           | 120 |
| 2015 | n-a-Si:H/NiO <sub>x</sub>                               | NiO <sub>x</sub>                     | Sputtering                     | NiO <sub>x</sub>        | NA             | 75        | 14   | 4.2   | 0   | 5    | @1.73V vs. RHE                           | 120 |
| 2015 | n-Si                                                    | TiO <sub>2</sub>                     | ALD                            | Ni                      | State-mediated | 100       | 14   | 2.5   | 10  | 35   | @1.85V vs. RHE                           | 121 |
| 2015 | n-Si/SiO <sub>x</sub> /CoO <sub>x</sub>                 | NiO <sub>x</sub>                     | Sputtering                     | NiO <sub>x</sub>        | band bending   | 85        | 14   | 70.83 | 0   | 30   | @1.63V vs. RHE                           | 122 |
| 2015 | np <sup>+</sup> -Si                                     | NiCoO <sub>x</sub>                   | Sputtering                     | (Ni,Fe)OOH              | band bending   | 40        | 14   | 3     | 0   | 30   | @1.4 V vs RHE                            | 123 |
| 2015 | n-ZnO                                                   | Ta <sub>2</sub> O <sub>5</sub>       | ALD                            | No                      | Tunneling      | 1.5       | 13   | 0.21  | 0   | 0.82 | @1.23V vs. RHE                           | 124 |
| 2015 | n-BiVO <sub>4</sub> :CoO <sub>x</sub>                   | NiOOH                                | ALD                            | CoO <sub>x</sub> /NiOOH | band bending   | 6         | 7    | 0.67  | 18  | 2.8  | @0.8V vs. RHE                            | 125 |
| 2015 | n-Fe <sub>2</sub> O <sub>3</sub>                        | IrO <sub>x</sub>                     | Electrodeposition              | Metal oxide             | NA             | 1         | 1.01 | 0.208 | 5   | 0.65 | @1.23V vs. RHE                           | 126 |
| 2015 | n-BiVO <sub>4</sub> :Mo,H                               | Co-Ci                                | Photodeposition                | Co-Ci                   | NA             | 4-10      | 7    | 2.5   | 0   | 3.2  | @1.03V vs. RHE                           | 127 |
| 2015 | n-BiVO <sub>4</sub> :Mo,H                               | Co-Ci                                | Photodeposition                | Co-Ci                   | NA             | 4-10      | 9    | 2.5   | 0   | 3.1  | @1.03V vs. RHE                           | 127 |
| 2016 | p <sup>+</sup> nn <sup>+</sup> -Si                      | NiCoO <sub>x</sub>                   | Sputtering                     | NiCoO <sub>x</sub>      | band bending   | 100       | 14   | 6     | 0   | 21.3 | @1.2V vs. RHE                            | 24  |
| 2016 | n-Si/n-Ta <sub>3</sub> N <sub>5</sub>                   | No                                   | NA                             | NiFeO <sub>x</sub>      | NA             | NA        | 13   | 1     | 40  | 1.6  | @1.23V vs. RHE, λ < 590 nm               | 128 |
| 2016 | n-WO <sub>3</sub> :Na                                   | No                                   | NA                             | WO <sub>3</sub> :Na     | NA             | NA        | -1.2 | 0.83  | 10  | 3    | @1.2V vs. RHE                            | 129 |
| 2016 | n-LaTiO <sub>2</sub> N                                  | No                                   | NA                             | CoO <sub>x</sub>        | NA             | NA        | 13   | 0.083 | 80  | 1.6  | @1.0V vs. RHE                            | 130 |
| 2016 | n-WO <sub>3</sub>                                       | FeOOH                                | Electrodeposition              | FeOOH                   | NA             | NA        | 6.6  | 0.083 | 36  | 1.4  | @1.23V vs. RHE                           | 131 |
| 2016 | n-Si                                                    | TiO <sub>x</sub> /ITO/NiOOH          | ALD/Sputtering/Photodeposition | NiOOH                   | band bending   | 3/15/140  | 12   | 0.285 | 54  | 13   | @1.23V vs. RHE                           | 132 |

Note that units for thickness, stability,  $J_{int}$  and degradation are nm, days, mA cm<sup>-2</sup> and %, respectively.
